# Supplementary material for: Nanoparticles with PDT and PTT synergistic properties working with dual NIR-light source simultaneously
Source: Royal Society of Chemistry journal article supplement (doi:10.1039/d0ra09954f), 2021-01-01
Supplement: d0ra09954f1.pdf [file d0ra09954f1.pdf]

## SUPPORTING INFORMATION

### Nanoparticles with PDT and PTT Synergistic Properties Working with Dual NIR-Light Source Simultaneously

Fazli Sozmen,<sup>\*</sup> <sup>a</sup> Merve Kucukoflaz,<sup>a</sup> Mustafa Ergul,<sup>b</sup> Zeynep Deniz S. Inan<sup>c</sup>

<sup>a</sup> Nanotechnology Engineering Department, Faculty of Engineering, Cumhuriyet University, 58140, Sivas, Turkey

<sup>b</sup> Biochemistry Department, Faculty of Pharmacy, Cumhuriyet University, 58140, Sivas, Turkey

<sup>c</sup> Histology and Embryology Department, Faculty of Medicine, Cumhuriyet University, 58140, Sivas, Turkey

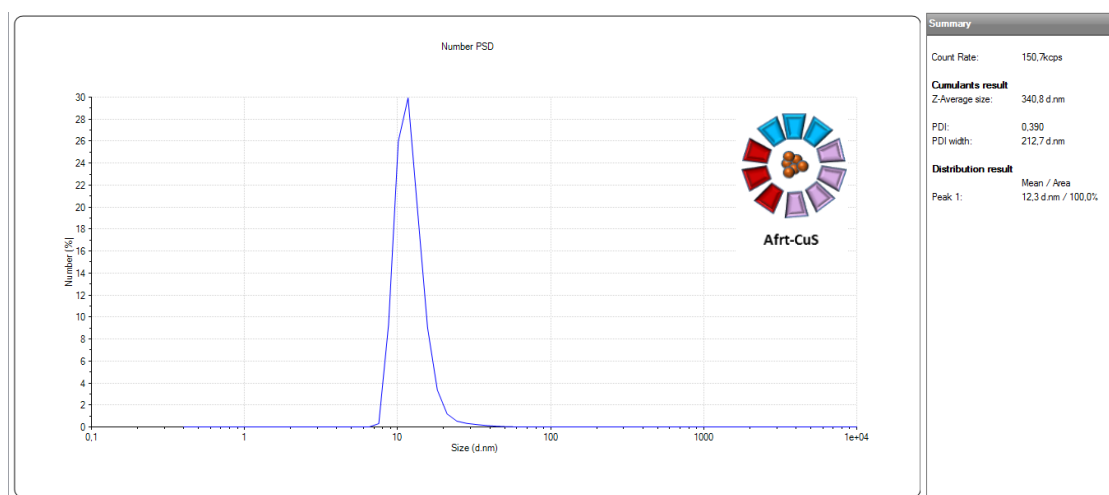

#### S1. Particle size analysis of Afirt-CuS nanoparticles.

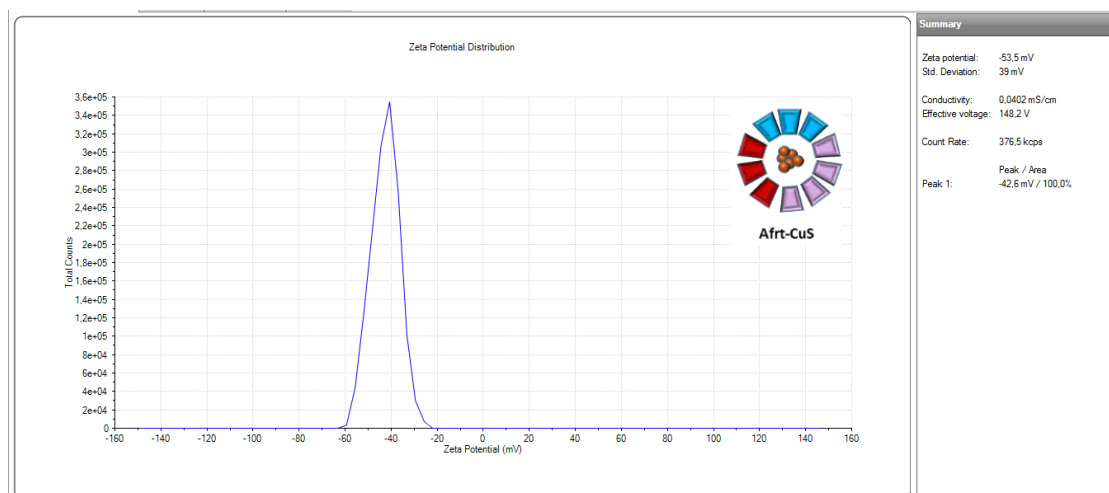

#### S2. The zeta potential of Afirt-CuS nanoparticles in ultrapure water (pH = 7.0).

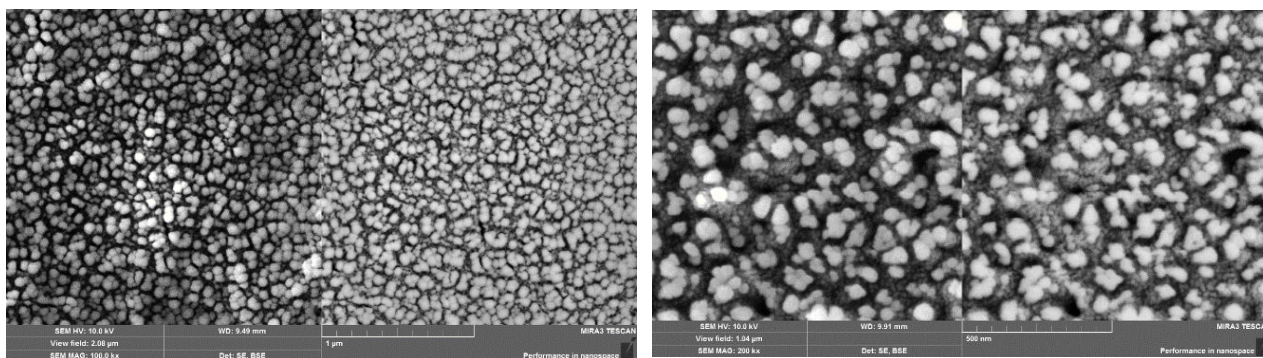

S3. SEM images of **Afrrt-CuS** nanoparticles stained with 2% Uranyl acetate.

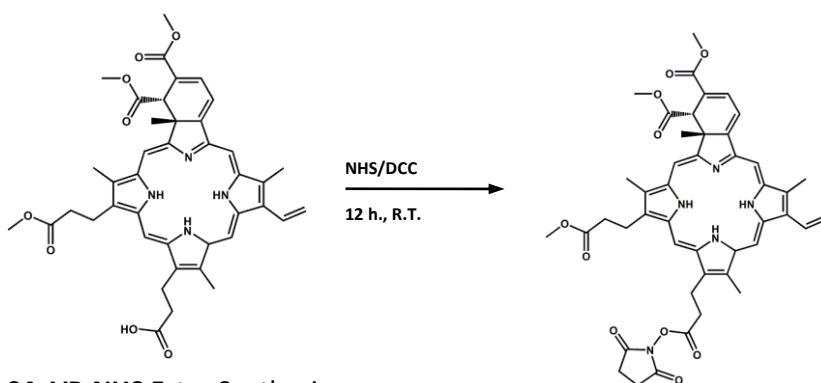

S4. **VP-NHS Ester** Synthesis.

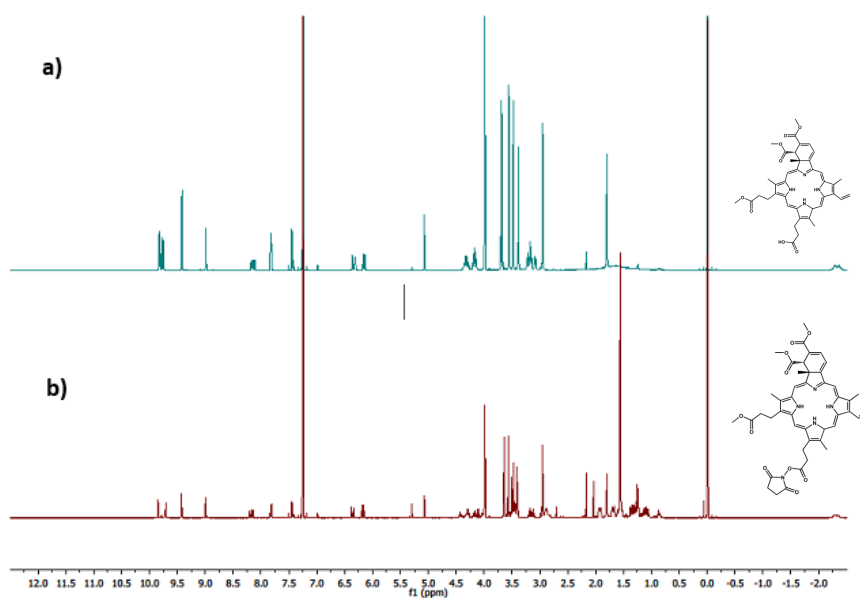

S5.  $^1\text{H-NMR}$  spectra of **VP** and **VP-NHS Ester**.

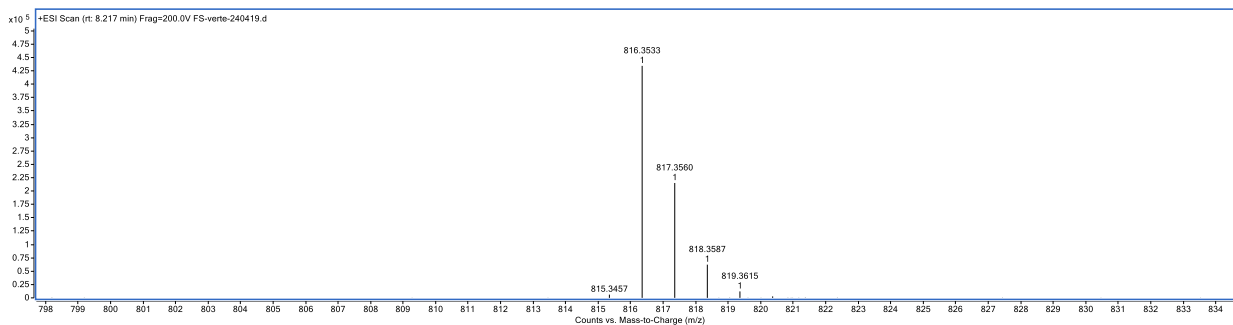

**S6.** Mass spectrum of **VP-NHS** ester, MS HRMS (TOF-ESI):  $m/z$  calculated: 817.3323; found: 817.3560 [M]<sup>+</sup>,  $\Delta = 28.99$  ppm.

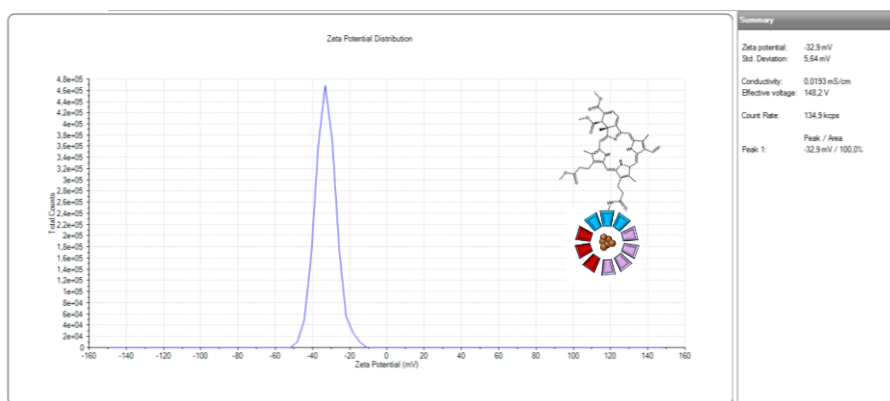

**S7.** The zeta potential of **VP-Afrrt-CuS** nanoparticles in ultrapure water (pH = 7.0).

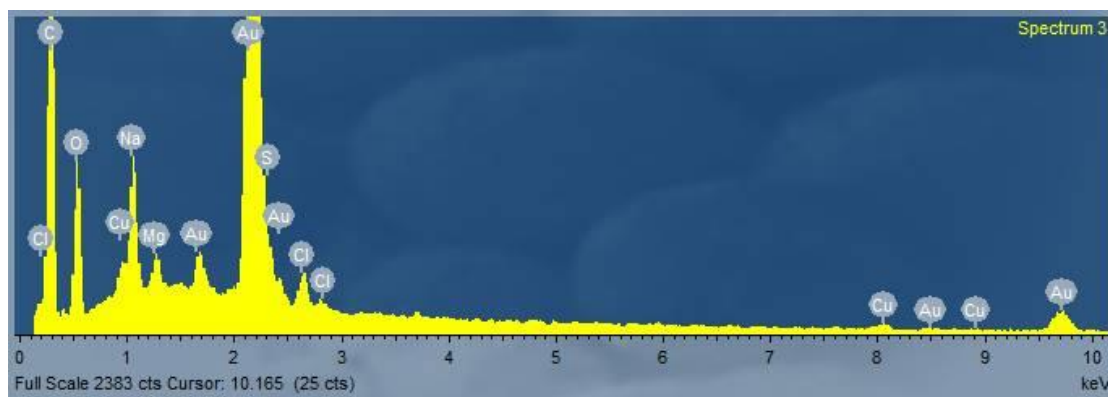

All results in weight%

| Spectrum   | In stats. | C     | O     | Na   | Mg   | S    | Cl   | Cu   | Total  |
|------------|-----------|-------|-------|------|------|------|------|------|--------|
| Spectrum 3 | Yes       | 64.21 | 26.95 | 3.43 | 0.67 | 1.47 | 1.05 | 2.22 | 100.00 |

**S8.** SEM/EDX results of **VP-Afrrt-CuS** nanoparticles.
